# Supplementary material for: NOD: a web server to predict New use of Old Drugs to facilitate drug repurposing
Source: Sci Rep. 2021 Jun 29;11:13540. doi: 10.1038/s41598-021-92903-8 (PMC8241987; doi:10.1038/s41598-021-92903-8)
Supplement: Supplementary file 2 — Supplementary Information 2. [file 41598_2021_92903_MOESM2_ESM.xlsx]

## Sheet: Index
NOD: A web server to predict New use of Old Drugs to facilitate drug repurposing Tarun J. Narwania, Narayanaswamy Srinivasana*, Sohini Chakrabortia aMolecular Biophysics Unit, Indian Institute of Science, Bengaluru 560012, Karnataka, India. *To whom correspondence should be addressed: ns@iisc.ac.in; Telephone: +91-80-22932837; Fax: +91-80-23600535. E-mail addresses of other authors: TJN: tjrnarwa…
			Table S1: List of potential candidates validating NOD results against available laboratory and/ or clinical data
				Table no.	Name of the worksheet	Description					No. of sequence tested for each job
				S1a	Mtb	Contains validation data from the results on M. tuberculosis mode-1 job.					4021 (whole proteome of Mtb)	The complete list of NOD generated results could be found at http://pauling.mbu.iisc.ac.in/NOD/NOD/webpages/archives.html
				S1b	P.falciparum	Contains validation data from the results on P.falciparum mode-1 job.					179 (Subset of the proteome: reviewed protein sequences from the UniProt were chosen)
				S1c	C.albicans	Contains validation data from the results on C. albicans mode-1 job.					6035 (whole proteome of C.albicans)
				S1d	SARS-CoV-2	Contains validation data from the results on SARS-CoV-2 mode-1 job.					16 (Subset of the proteome: reviewed protein sequences from the UniProt were chosen)
				S1e	HIV protease	Contains validation data from the results on HIV -1 protease mode-2 job.					1
				S1f	HCV protease	Contains validation data from the results on HCV protease mode-2 job.					1
				S1g	Auora-A kinase	Contains validation data from the results on Aurora-A kinase mode-2 job.					1
				S1h	BCR	Contains validation data from the results on BCR protein mode-2 job.					1
				TOTAL							10152

## Sheet: S1a_Mtb
Table S1a: Validation of NOD-generated results with protein sequences of M. tuberculosis (mode-1 job).
Disease (causative pathogen)	Sl. No.	Query protein (gene)	Target homolog protein (organism, gene)	Potential candidate (DrugBank ID)	Reference to laboratory and/or clinical evidence [The reference nos. are as per the Supplementary Information file]*
Tuberculosis (M. tuberculosis)	1	G0ZF23 (rpoB)	P0A8V2 (E. coli, rpoB)	Rifabutin (DB00615)	6
		G0ZF34 (rpoB)	P0A8V2 (E. coli, rpoB)
		A6ZI23 (rpoB)	P0A8V2 (E. coli, rpoB)
		D9YMC3 (rpoB)	P0A8V2 (E. coli, rpoB)
		G0ZF28 (rpoB)	P0A8V2 (E. coli, rpoB)
		G0ZF27 (rpoB)	P0A8V2 (E. coli, rpoB)
		G0ZF36 (rpoB)	P0A8V2 (E. coli, rpoB)
		M4PJD1 (rpoB)	P0A8V2 (E. coli, rpoB)
		A0A2Z3DFA7 (rpoB)	P0A8V2 (E. coli, rpoB)
		A0A2Z3DI51 (rpoB)	P0A8V2 (E. coli, rpoB)
		G0ZF12 (rpoB)	P0A8V2 (E. coli, rpoB)
		P9WGZ1 (rpoA)	P0A7Z4 (E. coli, rpoA)
		P9WMJ7 (htpG)	P14625 (Human, HSP90B1)
	2	G0ZF23 (rpoB)	P0A8V2 (E. coli, rpoB)	Rifamycin (DB11753)	7
		G0ZF34 (rpoB)	P0A8V2 (E. coli, rpoB)
		A6ZI23 (rpoB)	P0A8V2 (E. coli, rpoB)
		D9YMC3 (rpoB)	P0A8V2 (E. coli, rpoB)
		G0ZF28 (rpoB)	P0A8V2 (E. coli, rpoB)
		G0ZF27 (rpoB)	P0A8V2 (E. coli, rpoB)
		G0ZF36 (rpoB)	P0A8V2 (E. coli, rpoB)
		M4PJD1 (rpoB)	P0A8V2 (E. coli, rpoB)
		A0A2Z3DFA7 (rpoB)	P0A8V2 (E. coli, rpoB)
		A0A2Z3DI51 (rpoB)	P0A8V2 (E. coli, rpoB)
		G0ZF12 (rpoB)	P0A8V2 (E. coli, rpoB)
		P9WGZ1 (rpoA)	P0A7Z4 (E. coli, rpoA)
	3	P9WH63 (rpsL)	P0A7S3 (E. coli, rpsL)	Amikacin (DB00479)	8
	4	P9WH63 (rpsL)	P0A7S3 (E. coli, rpsL)	Streptomycin (DB01082)	8
	5	P9WH63 (rpsL)	P0A7S3 (E. coli, rpsL)	Kanamycin (DB01172)	8
	6	A0A0N9DRW0 (katG)	P9WIE5 (katG)	Ethionamide (DB00609)	9
		A0A0N9DS37 (katG)	P9WIE5 (katG)
		A0A0N7EHL2 (katG)	P9WIE5 (katG)
		A0A0N7EHL5 (katG)	P9WIE5 (katG)
		A0A0N9DS11 (katG)	P9WIE5 (katG)
		A0A0N9DSA1 (katG)	P9WIE5 (katG)
		A0A0N9DRY5 (katG)	P9WIE5 (katG)
		A0A0N6WYR6 (katG)	P9WIE5 (katG)
		A0A0N9DS13 (katG)	P9WIE5 (katG)
		P9WIE5 (katG)	P9WIE5 (katG)
		A0A0N9DRZ8 (katG)	P9WIE5 (katG)
		I6YBX7 (katG)	P9WIE5 (katG)
		A0A0N9DRZ5 (katG)	P9WIE5 (katG)
		A0A0N6WYQ3 (katG)	P9WIE5 (katG)
		A0A0N9DQI3 (katG)	P9WIE5 (katG)
		A0A0N7EHL4 (katG)	P9WIE5 (katG)
		A0A0N9DS52 (katG)	P9WIE5 (katG)
		A0A0N6WYR3 (katG)	P9WIE5 (katG)
		A0A0N9DS80 (katG)	P9WIE5 (katG)
		A0A0N9DRV6 (katG)	P9WIE5 (katG)
		A0A0N9DRZ6 (katG)	P9WIE5 (katG)
		A0A0N9DS42 (katG)	P9WIE5 (katG)
		A0A0N6WYR5 (katG)	P9WIE5 (katG)
		A0A0N9DRX8 (katG)	P9WIE5 (katG)
		A0A0N9DS03 (katG)	P9WIE5 (katG)
		A0A0N9DRZ0 (katG)	P9WIE5 (katG)
		P9WGR1 (inhA )	P9WGR1 (inhA )
		A0A2Z3DKC1 (katG)	P9WIE5 (katG)
		A0A0N7EHL1 (katG)	P9WIE5 (katG)
		M4PLX9 (katG)	P9WIE5 (katG)
		I6Y3S9 (Rv3530c)	P9WGR1 (inhA )
		A0A0N9DS19 (katG)	P9WIE5 (katG)
		P9WGR9 (fabG2)	P9WGR1 (inhA )
		A0A0N9DS30 (katG)	P9WIE5 (katG)
		A0A0N9DS93 (katG)	P9WIE5 (katG)
		A0A0N7EHL6 (katG)	P9WIE5 (katG)
		P9WGQ9 (Rv0769)	P9WGR1 (inhA )
		A0A0N9DS04 (katG)	P9WIE5 (katG)
		A0A0N9DS10 (katG)	P9WIE5 (katG)
		A0A0N9DRV9 (katG)	P9WIE5 (katG)
		P9WGS7 (Rv0687)	P9WGR1 (inhA )
		P9WGQ7 (Rv1144)	P9WGR1 (inhA )
		P9WGS5 (Rv2750)	P9WGR1 (inhA )
		I6XZC4 (Rv1941)	P9WGR1 (inhA )
		P95286 (Rv1928c)	P9WGR1 (inhA )
		P9WGQ1 (Rv1856c)	P9WGR1 (inhA )
		I6Y1W3 (Rv2857c)	P9WGR1 (inhA )
		A0A0N9DQW1 (katG)	P9WIE5 (katG)
		A0A0N9DS48 (katG)	P9WIE5 (katG)
		A0A0N6WYQ2 (katG)	P9WIE5 (katG)
		P9WGT3 (fabG1)	P9WGR1 (inhA )
		P9WGQ5 (Rv0927c)	P9WGR1 (inhA )
		I6YCF0 (Rv3559c)	P9WGR1 (inhA )
		P9WGT1 (fabG3)	P9WGR1 (inhA )
		A0A0N9DS08 (katG)	P9WIE5 (katG)
		I6YEB6 (Rv2766c)	P9WGR1 (inhA )
		P9WGQ3 (Rv1714)	P9WGR1 (inhA )
		A0A0N9DS32 (katG)	P9WIE5 (katG)
		I6YCE1 (Rv3549c)	P9WGR1 (inhA )
		A0A0N9DS09 (katG)	P9WIE5 (katG)
		P9WGR5 (Rv0484c)	P9WGR1 (inhA )
		I6WZD9 (Rv0765c)	P9WGR1 (inhA )
		P71853 (Rv3548c)	P9WGR1 (inhA )
		P96825 ( Rv0148)	P9WGR1 (inhA )
		O05842 (Rv3224)	P9WGR1 (inhA )
		I6YB11 (Rv3057c)	P9WGR1 (inhA )
		O53547 (Rv3502c)	P9WGR1 (inhA )
		O06348 (Rv3485c)	P9WGR1 (inhA )
		A0A0N7EHL7 (katG)	P9WIE5 (katG)
		P9WGR7 (Rv0945)	P9WGR1 (inhA )
		P9WGS9 (dprE2)	P9WGR1 (inhA )
		P9WGR3 (Rv2073c)	P9WGR1 (inhA )
		O53324 (Rv3174)	P9WGR1 (inhA )
		I6Y9I3 (Rv2509)	P9WGR1 (inhA )
		Q10782 (Rv1544)	P9WGR1 (inhA )
		O50460 (Rv1245c)	P9WGR1 (inhA )
	7	A0A0N9DRW0 (katG)	P9WIE5 (katG)	Isoniazid (DB00951)	10
		A0A0N9DSA1 (katG)	P9WIE5 (katG)
		I6YBX7 (katG)	P9WIE5 (katG)
		A0A0N7EHL2 (katG)	P9WIE5 (katG)
		A0A0N7EHL5 (katG)	P9WIE5 (katG)
		A0A0N9DRZ8 (katG)	P9WIE5 (katG)
		A0A0N9DS11 (katG)	P9WIE5 (katG)
		A0A0N9DRY5 (katG)	P9WIE5 (katG)
		A0A0N6WYR6 (katG)	P9WIE5 (katG)
		P9WIE5 (katG)	P9WIE5 (katG)
		A0A0N9DS13 (katG)	P9WIE5 (katG)
		A0A0N9DS37 (katG)	P9WIE5 (katG)
		A0A0N6WYR3 (katG)	P9WIE5 (katG)
		A0A0N9DRZ5 (katG)	P9WIE5 (katG)
		A0A0N6WYQ3 (katG)	P9WIE5 (katG)
		A0A0N9DQI3 (katG)	P9WIE5 (katG)
		A0A0N7EHL4 (katG)	P9WIE5 (katG)
		A0A0N9DS52 (katG)	P9WIE5 (katG)
		A0A0N9DRV6 (katG)	P9WIE5 (katG)
		A0A0N9DS80 (katG)	P9WIE5 (katG)
		A0A0N9DRZ6 (katG)	P9WIE5 (katG)
		A0A0N9DS42 (katG)	P9WIE5 (katG)
		A0A0N6WYR5 (katG)	P9WIE5 (katG)
		A0A0N9DRX8 (katG)	P9WIE5 (katG)
		A0A0N9DS03 (katG)	P9WIE5 (katG)
		A0A0N9DRZ0 (katG)	P9WIE5 (katG)
		P9WGR1 (inhA )	P9WGR1 (inhA )
		A0A2Z3DKC1 (katG)	P9WIE5 (katG)
		A0A0N7EHL1 (katG)	P9WIE5 (katG)
		P9WNX1 (folA)	P9WNX1 (folA)
		M4PLX9 (katG)	P9WIE5 (katG)
		I6Y3S9 (Rv3530c)	P9WGR1 (inhA )
		A0A0N9DS19 (katG)	P9WIE5 (katG)
		P9WGR9 (fabG2)	P9WGR1 (inhA )
		A0A0N9DS30 (katG)	P9WIE5 (katG)
		A0A0N9DS93 (katG)	P9WIE5 (katG)
		A0A0N7EHL6 (katG)	P9WIE5 (katG)
		P9WGQ9 (Rv0769)	P9WGR1 (inhA )
		P9WPP9 (cyp51)	P08684 (Human, CYP3A4)
		A0A0N9DS04 (katG)	P9WIE5 (katG)
		A0A0N9DS10 (katG)	P9WIE5 (katG)
		A0A0N9DRV9 (katG)	P9WIE5 (katG)
		P9WPM1 (cyp139)	P05177 (Human, CYP1A2)
		P9WPP9 (cyp51)	P05177 (Human, CYP1A2)
		P9WGS7 (Rv0687)	P9WGR1 (inhA )
		P9WGQ7 (Rv1144)	P9WGR1 (inhA )
		P9WGS5 (Rv2750)	P9WGR1 (inhA )
		I6XZC4 (Rv1941)	P9WGR1 (inhA )
		P9WPM1 (cyp139)	P08684 (Human, CYP3A4)
		P9WPN1 (cyp135A1)	P05177 (Human, CYP1A2)
		P9WPN3 (cyp132)	P05177 (Human, CYP1A2)
		P95286 (Rv1928c)	P9WGR1 (inhA )
		P9WPM3 (cyp138)	P05177 (Human, CYP1A2)
		P9WPP9 (cyp51)	P33261 (Human, CYP2C19)
		P9WGQ1 (Rv1856c)	P9WGR1 (inhA )
		I6Y1W3 (Rv2857c)	P9WGR1 (inhA )
		A0A0N9DQW1 (katG)	P9WIE5 (katG)
		A0A0N9DS48 (katG)	P9WIE5 (katG)
		P9WPN1 (cyp135A1)	P08684 (Human, CYP3A4)
		A0A0N6WYQ2 (katG)	P9WIE5 (katG)
		P9WPP9 (cyp51)	P10632 (Human, CYP2C8)
		P9WGT3 (fabG1)	P9WGR1 (inhA )
		P9WPM3 (cyp138)	P08684 (Human, CYP3A4)
		P9WPN1 (cyp135A1)	P10632 (Human, CYP2C8)
		P9WPN1 (cyp135A1)	P33261 (Human, CYP2C19)
		P9WGQ5 (Rv0927c)	P9WGR1 (inhA )
		I6YCF0 (Rv3559c)	P9WGR1 (inhA )
		P9WGT1 (fabG3)	P9WGR1 (inhA )
		P9WPM9 (cyp135B1)	P08684 (Human, CYP3A4)
		A0A0N9DS08 (katG)	P9WIE5 (katG)
		I6YEB6 (Rv2766c)	P9WGR1 (inhA )
		P9WPM5 (cyp137)	P05177 (Human, CYP1A2)
		P9WPM1 (cyp139)	P10632 (Human, CYP2C8)
		P9WGQ3 (Rv1714)	P9WGR1 (inhA )
		P9WPM9 (cyp135B1)	P05177 (Human, CYP1A2)
		P9WPM1 (cyp139)	P33261 (Human, CYP2C19)
		P9WPM3 (cyp138)	P10632 (Human, CYP2C8)
		A0A0N9DS32 (katG)	P9WIE5 (katG)
		P9WPM3 (cyp138)	P33261 (Human, CYP2C19)
		P9WPN3 (cyp132)	P08684 (Human, CYP3A4)
		I6YCE1 (Rv3549c)	P9WGR1 (inhA )
		P9WPN3 (cyp132)	P10632 (Human, CYP2C8)
		P9WPM5 (cyp137)	P08684 (Human, CYP3A4)
		P9WPM7 (cyp136)	P08684 (Human, CYP3A4)
		P9WPM9 (cyp135B1)	P10632 (Human, CYP2C8)
		P9WPN3 (cyp132)	P33261 (Human, CYP2C19)
		P9WPM7 (cyp136)	P05177 (Human, CYP1A2)
		P9WPM7 (cyp136)	P33261 (Human, CYP2C19)
		A0A0N9DS09 (katG)	P9WIE5 (katG)
		P9WPM7 (cyp136)	P10632 (Human, CYP2C8)
		P9WGR5 (Rv0484c)	P9WGR1 (inhA )
		P9WPM9 (cyp135B1)	P33261 (Human, CYP2C19)
		I6WZD9 (Rv0765c)	P9WGR1 (inhA )
		P9WPL3 (cyp143)	P33261 (Human, CYP2C19)
		P9WPM5 (cyp137)	P10632 (Human, CYP2C8)
		P71853 (Rv3548c)	P9WGR1 (inhA )
		P9WPM5 (cyp137)	P33261 (Human, CYP2C19)
		P96825 (Rv0148)	P9WGR1 (inhA )
		O05842 (Rv3224)	P9WGR1 (inhA )
		P9WPL3 (cyp143)	P08684 (Human, CYP3A4)
		I6YB11 (Rv3057c)	P9WGR1 (inhA )
		O53547 (Rv3502c)	P9WGR1 (inhA )
		O06348 (Rv3485c)	P9WGR1 (inhA )
		P9WPL7 (cyp141)	P10632 (Human, CYP2C8)
		P9WPP5 cyp123	P33261 (Human, CYP2C19)
		P9WPL3 (cyp143)	P10632 (Human, CYP2C8)
		A0A0N7EHL7 (katG)	P9WIE5 (katG)
		P9WGR7 (Rv0945)	P9WGR1 (inhA )
		P9WGS9 (dprE2)	P9WGR1 (inhA )
		P9WGR3 (Rv2073c)	P9WGR1 (inhA )
		O53324 (Rv3174)	P9WGR1 (inhA )
		P9WPL7 (cyp141)	P08684 (Human, CYP3A4)
		P9WPL7 (cyp141)	P33261 (Human, CYP2C19)
		P9WPM5 (cyp137)	P10632 (Human, CYP2C8)
		I6Y9I3 (Rv2509)	P9WGR1 (inhA )
		P9WPP3 (cyp124)	P08684 (Human, CYP3A4)
		Q10782 (Rv1544)	P9WGR1 (inhA )
		O50460 (Rv1245c)	P9WGR1 (inhA )
		P9WPN7 (cyp128)	P33261 (Human, CYP2C19)
	8	P9WJY5 (efpA)	P9WJY5 (efpA)	Pretomanid (DB05154)	11
		L7N662 (cydA)	A0A045KKX4 (cydA)
		O06139 (cydB)	A0A045ISQ8 (cydB)
		P9WGR1 (inhA )	P9WGR1 (inhA )
		I6Y3S9 (Rv3530c)	P9WGR1 (inhA )
		P9WIP7 (lsr2)	P9WIP7 (lsr2)
		P9WGR9 (fabG2)	P9WGR1 (inhA )
		P9WGQ9 (Rv0769)	P9WGR1 (inhA )
		P9WGS7 (Rv0687)	P9WGR1 (inhA )
		P9WGQ7 (Rv1144)	P9WGR1 (inhA )
		P9WGS5 (Rv2750)	P9WGR1 (inhA )
		I6XZC4 (Rv1941)	P9WGR1 (inhA )
		P95286 (Rv1928c)	P9WGR1 (inhA )
		P9WGQ1 (Rv1856c)	P9WGR1 (inhA )
		I6Y1W3 (Rv2857c)	P9WGR1 (inhA )
		P9WGT3 (fabG1)	P9WGR1 (inhA )
		P9WGQ5 (Rv0927c)	P9WGR1 (inhA )
		I6YCF0 (Rv3559c)	P9WGR1 (inhA )
		P9WGT1 (fabG3)	P9WGR1 (inhA )
		I6YEB6 (Rv2766c)	P9WGR1 (inhA )
		P9WGQ3 (Rv1714)	P9WGR1 (inhA )
		P9WJX3 (Rv1634)	P9WJY5 (efpA)
		I6YCE1 (Rv3549c)	P9WGR1 (inhA )
		O05779 (ftsE)	A0A0T9AZ62
		P9WGR5 (Rv0484c)	P9WGR1 (inhA )
		I6WZD9 (Rv0765c)	P9WGR1 (inhA )
		P71853 (Rv3548c)	P9WGR1 (inhA )
		P9WQK1 (Rv0986)	A0A0T9AZ62
		P96825 (Rv0148)	P9WGR1 (inhA )
		O05842 (Rv3224)	P9WGR1 (inhA )
		P9WJY3 (Rv1410c)	P9WJY5 (efpA)
		P9WQL1 (pstB1)	A0A0T9AZ62
		I6YB11 (Rv3057c)	P9WGR1 (inhA )
		O53154 (Rv1463)	A0A0T9AZ62
		P9WJW9 (jefA)	P9WJY5 (efpA)
		P9WG89 (emrB)	P9WJY5 (efpA)
		O53547 (Rv3502c)	P9WGR1 (inhA )
		O06348 (Rv3485c)	P9WGR1 (inhA )
		P9WGR7 (Rv0945)	P9WGR1 (inhA )
		P9WG91 (stp)	P9WGR1 (inhA )
		P9WGS9 (dprE2)	P9WGR1 (inhA )
		P9WGR3 (Rv2073c)	P9WGR1 (inhA )
		O06137 (cydC)	A0A0T9AZ62
		O53324 (Rv3174)	P9WGR1 (inhA )
		P9WQK9 (pstB2)	A0A0T9AZ62
		O33189 (Rv1687c)	A0A0T9AZ62
		O06138 (cydD)	A0A0T9AZ62
		P9WQJ7 (irtB)	A0A0T9AZ62
		I6YF11 (Rv3041c)	A0A0T9AZ62
		P9WQJ1 (Rv1273c)	A0A0T9AZ62
		I6Y9I3 (Rv2509)	P9WGR1 (inhA )
		P9WG87 (Rv1250)	P9WJY5 (efpA)
		Q10782 (Rv1544)	P9WGR1 (inhA )
		O50460 (Rv1245c)	P9WGR1 (inhA )
	9	P9WNL7 (embB)	P9WNL7 (embB)	Ethambutol (DB00330)	12
		P9WNL7 (embB)	P9WNL5 (embC)
		P9WNL7 (embB)	P9WNL9 (embA)
		P9WNL9 (embA)	P9WNL9 (embA)
		P9WNL9 (embA)	P9WNL7 (embB)
		P9WNL9 (embA)	P9WNL5 (embC)
		Q3HKR4 (embB)	P9WNL7 (embB)
		Q3HKR4 (embB)	P9WNL5 (embC)
		Q3HKR4 (embB)	P9WNL9 (embA)
		P9WNL5 (embC)	P9WNL5 (embC)
		P9WNL5 (embC)	P9WNL7 (embB)
		P9WNL5 (embC)	P9WNL9 (embA)
	10	G0ZF23 (rpoB)	P0A8V2 (E. coli, rpoB)	Rifampicin (DB01045)	13
		G0ZF34 (rpoB)	P0A8V2 (E. coli, rpoB)
		A6ZI23 (rpoB)	P0A8V2 (E. coli, rpoB)
		D9YMC3 (rpoB)	P0A8V2 (E. coli, rpoB)
		G0ZF28 (rpoB)	P0A8V2 (E. coli, rpoB)
		G0ZF27 (rpoB)	P0A8V2 (E. coli, rpoB)
		G0ZF36 (rpoB)	P0A8V2 (E. coli, rpoB)
		M4PJD1 (rpoB)	P0A8V2 (E. coli, rpoB)
		A0A2Z3DFA7 (rpoB)	P0A8V2 (E. coli, rpoB)
		A0A2Z3DI51 (rpoB)	P0A8V2 (E. coli, rpoB)
		G0ZF12 (rpoB)	P0A8V2 (E. coli, rpoB)
	11	P9WND1 (folP1)	P0AC13 (E. coli, folP)	Sulfamethoxazole (DB01015)	14
		P9WNC9 (folP2)	P0AC13 (E. coli, folP)
	12	P9WNX1 (folA)	P0ABQ4 (E. coli, folA)	Trimethoprim (DB00440)	14
	13	P9WPS1 (atpE)	P9WPS1 (atpE)	Bedaquiline (DB08903)	15
	14	P9WGY7 (rpoC)	P9WGY7 (rpoC)	Rifapentine (DB01201)	16
The complete list of NOD generated results could be found on the 'Arch-NOD' page of the NOD webserver. *The full references can be found in the Supplementary Information.

## Sheet: S1b_P.falciparum
Table S1b: Validation of NOD-generated results with protein sequences of P. falciparum (mode-1 job).
Disease (causative pathogen)	Sl. No.	Query protein (gene)	Target homolog protein (organism, gene)	Potential candidate (DrugBank ID)	Reference to laboratory and/or clinical evidence [The reference nos. are as per the Supplementary Information file]*
Malaria (P. falciparum)	1	Q8ILQ7 (GST)	Q8MU52 (GST)	Chloroquine (DB00608)	17
		Q8ILQ7 (GST)	P09488 (Human, GSTM1)
		Q8ILQ7 (GST)	P09210 (Human, GSTA2)
	2	Q8I6U8 (GBP)	Q8I6U8 (GBP)	Artenimol (DB11638)	18
		Q8IIJ9 (PF11_0174)	A0A144A2G5 (PF3D7_1116700)
		Q76NM6 (vapA)	Q76NM6 (vapA)
		O77323 (MAL3P3.6)	O77323 (MAL3P3.6)
		Q8IBS5 (CPK4)	Q8IBS5 (CPK4)
		P50250 (PFE1050w)	P50250 (PFE1050w)
		Q8IJN7 (ENO)	Q8IJN7 (ENO)
		Q7KQM4 (PF14_0076)	Q7KQM4 (PF14_0076)
		Q7KQM4 (PF14_0076)	P46925
		Q8IBZ9 (CG10)	Q9N623 (CRT)
		Q6LFH8 (OAT)	Q6LFH8 (OAT)
		Q8I4X0 (PFL2215w)	P86287
		Q8ILW9 (PF14_0124)	P63261 (ACTG1)
		Q7KQL9 (PF14_0425)	P14223
		C6KT50 (pdx1)	C6KT50 (pdx1)
		O97313 (MAL3P7.35)	O97313 (MAL3P7.35)
		C0H4X5 (MAL8P1.31)	C0H4X5 (MAL8P1.31)
		Q7KQL5 (PF10_0084)	Q7KQL5 (PF10_0084)
		Q8ILW9 (PF14_0124)	P86287
		Q8I3Z5 (TCTP)	Q8I3Z5 (TCTP)
		Q7KQM4 (PF14_0076)	Q8IM15 (PF3D7_1408100)
		Q7KQM4 (PF14_0076)	Q8IM16 (PF3D7_1407800)
		Q7KQL5 (PF10_0084)	Q9BUF5 (TUBB6)
		P27362 (PGK)	P00558 (PGK1)
		Q8I4X0 (PFL2215w)	P63261 (ACTG1)
		Q7KQL5 (PF10_0084)	P14642
		Q7KQL5 (PF10_0084)	P07437 (TUBB)
		Q7KQL5 (PF10_0084)	P04350 (TUBB4A)
		Q8I566 (SHMT)	P34897 (Human, SHMT2)
		Q8IJN7 (ENO)	P06733 (ENO1)
		Q7KQL5 (PF10_0084)	Q71U36 (TUBA1A)
		P61075 (CRK2)	Q8IIR9 (PF3D7_1108400)
		Q7KQM0 (TPI)	P60174 (TPI1)
		Q25820 (tufA)	Q00080 (MEF-1)
		Q8ICR0 (CPK2)	Q8IBS5 (CPK4)
		Q25820 (tufA)	P68104 (EEF1A1)
		P62344 (CPK1)	Q8IBS5 (CPK4)
		O77323 (MAL3P3.6)	P49368 (CCT3)
		Q7KQL9 (PF14_0425)	P04075 (ALDOA)
		P24044	Q8IBS5 (CPK4)
		P62203 (PF14_0323)	Q8IBS5 (CPK4)
		Q8ID92 (PF13_0326)	P23528 (CFL1)
		Q7KQL8 (PF14_0545)	Q8IKL4 (tlp1)
		Q7KQL3 (ARF1)	P38545
		Q8IBZ9 (CG10)	Q8IBS5 (CPK4)
		Q9NJU9 (CPK3)	Q8IBS5 (CPK4)
		Q8IDR3 (PF13_0233)	P35579 (MYH9)
		Q8I467 (PFE0165w)	P23528 (CFL1)
		Q7KQL3 (ARF1)	Q8I4W4 (PF3D7_1246800)
		Q7KQL8 (PF14_0545)	C0H4Y6 (PF3D7_0827900)
		Q8ILQ7 (GST)	Q8IDV0
		Q7KQL8 (PF14_0545)	Q8IB72 (PF3D7_0823800)
		P61075 (CRK2)	Q8IBS5 (CPK4)
		Q7KQL3 (ARF1)	Q00080 (MEF-1)
		Q7KQL8 (PF14_0545)	C0H4Y6 (PF3D7_0827900)
		Q7KQL8 (PF14_0545)	P07237 (P4HB)
		Q7KQL8 (PF14_0545)	P07237 (P4HB)
		Q8ILQ7 (GST)	O00299 (CLIC1)
		Q8IHZ9 (CK1)	Q8IIR9 (PF3D7_1108400)
	3	P61075 (CRK2)	O60674 (Human, JAK2)	Ruxolitinib (DB08877)	19
		P61075 (CRK2)	P23458 (Human, JAK1)
		P61075 (CRK2)	P23458 (Human, JAK1)
		Q8IHZ9 (CK1)	O60674 (Human, JAK2)
		Q8IHZ9 (CK1)	O60674 (Human, JAK2)
		Q8IHZ9 (CK1)	P23458 (Human, JAK1)
		Q8IHZ9 (CK1)	P23458 (Human, JAK1)
	4	Q7KQL5 (PF10_0084)	P68371 (Human, TUBB4B)	Albendazole (DB00518)	20
		Q7KQL5 (PF10_0084)	F1L7U3 (Ascaris suum, N/A)
		Q7KQL5 (PF10_0084)	Q71U36 (Human, TUBA1A)
	5	Q8IKG4 (DXR)	P45568 (E. coli, dxr)	Fosmidomycin (DB02948)	21
	6	Q8I1R6 (PF3D7_0417200)	P13922 (P. falciparum (isolate K1 / Thailand), N/A)	Proguanil (DB01131)	22
	7	Q8I1R6 (PF3D7_0417200)	P13922 (P. falciparum (isolate K1 / Thailand), N/A)	Pyrimethamine (DB00205)	23
	8	Q27738	Q27738	Sulfadoxine (DB01299)	24
		Q8I1R6 (PF3D7_0417200)	P13922 (P. falciparum (isolate K1 / Thailand), N/A)
N/A : Not Available *The full references can be found in the Supplementary Information. The complete list of NOD generated results could be found on the 'Arch-NOD' page of the NOD webserver.

## Sheet: S1c_C.albicans
Table S1c: Validation of NOD-generated results with protein sequences of C. albicans (mode-1 job).
Disease (causative pathogen)	Sl. No.	Query protein (gene)	Target homolog protein (organism, gene)	Potential candidate (DrugBank ID)	Reference to laboratory and/or clinical evidence [The reference nos. are as per the Supplementary Information file]*
Candidiasis (C. albicans)	1	P10613 (ERG11)	P10613 (ERG11)	Clotrimazole (DB00257)	25
		Q5AGW4 (ALK6)	P10613 (ERG11)
		A0A1D8PQ77 (orf19.5728)	P10613 (ERG11)
		Q59K96 (ALK8)	P10613 (ERG11)
		A0A1D8PMR7 (orf19.3105)	P10613 (ERG11)
		G1UB11 (ERG5)	P10613 (ERG11)
		A0A1D8PRP5 (CAALFM_CR00220WA)	P10613 (ERG11)
		A0A1D8PM13 (orf19.1411)	P10613 (ERG11)
		A0A1D8PRN7 (ALK2)	P10613 (ERG11)
	2	A0A1D8PDL5 (GSL1)	A2QLK4 (Aspergillus niger, fksA)	Anidulafungin (DB00362)	26
		A0A1D8PRT5 (GSL2)	A2QLK4 (Aspergillus niger, fksA)
		A0A1D8PCT0 (GSC1)	A2QLK4 (Aspergillus niger, fksA)
	3	P10613 (ERG11)	P10613 (ERG11)	Posaconazole (DB01263)	27
		Q5AGW4 (ALK6)	P10613 (ERG11)
		A0A1D8PQ77 (orf19.5728)	P10613 (ERG11)
		Q59K96 (ALK8)	P10613 (ERG11)
		A0A1D8PMR7 (orf19.3105)	P10613 (ERG11)
		G1UB11 (ERG5)	P10613 (ERG11)
		A0A1D8PRP5 (CAALFM_CR00220WA)	P10613 (ERG11)
		A0A1D8PM13 (orf19.1411)	P10613 (ERG11)
		A0A1D8PRN7 (ALK2)	P10613 (ERG11)
	4	P10613 (ERG11)	P50859 (Candida glabrata, ERG11)	Isavuconazole (DB11633)	28
		Q5AGW4 (ALK6)	P50859 (Candida glabrata, ERG11)
		A0A1D8PQ77 (orf19.5728)	P50859 (Candida glabrata, ERG11)
		Q59K96 (ALK8)	P50859 (Candida glabrata, ERG11)
		A0A1D8PMR7 (orf19.3105)	P50859 (Candida glabrata, ERG11)
		G1UB11 (ERG5)	P50859 (Candida glabrata, ERG11)
		A0A1D8PRP5 (CAALFM_CR00220WA)	P50859 (Candida glabrata, ERG11)
		A0A1D8PM13 (orf19.1411)	P50859 (Candida glabrata, ERG11)
		A0A1D8PRN7 (ALK2)	P50859 (Candida glabrata, ERG11)
	5	A0A1D8PDL5 (GSL1)	A2QLK4 (Aspergillus niger, fksA)	Caspofungin (DB00520)	29
		A0A1D8PRT5 (GSL2)	A2QLK4 (Aspergillus niger, fksA)
		A0A1D8PCT0 (GSC1)	A2QLK4 (Aspergillus niger, fksA)
	6	A0A1D8PDL5 (GSL1)	A2QLK4 (Aspergillus niger, fksA)	Micafungin (DB01141)	30
		A0A1D8PRT5 (GSL2)	A2QLK4 (Aspergillus niger, fksA)
		A0A1D8PCT0 (GSC1)	A2QLK4 (Aspergillus niger, fksA)
	7	P10613 (ERG11)	P50859 (Candida glabrata, ERG11)	Efinaconazole (DB09040)	31
		Q5AGW4 (ALK6)	P50859 (Candida glabrata, ERG11)
		A0A1D8PQ77 (orf19.5728)	P50859 (Candida glabrata, ERG11)
		Q59K96 (ALK8)	P50859 (Candida glabrata, ERG11)
		A0A1D8PMR7 (orf19.3105)	P50859 (Candida glabrata, ERG11)
		G1UB11 (ERG5)	P50859 (Candida glabrata, ERG11)
		A0A1D8PRP5 (CAALFM_CR00220WA)	P50859 (Candida glabrata, ERG11)
		A0A1D8PM13 (orf19.1411)	P50859 (Candida glabrata, ERG11)
		A0A1D8PRN7 (ALK2)	P50859 (Candida glabrata, ERG11)
	8	Q92206 (ERG1)	Q14534 (Human, SQLE)	Naftifine (DB00735)	32
		Q5A7M3 (BNA4)	Q14534 (Human, SQLE)
	9	A0A1D8PS12 (CDC60)	Q9HGT2 (CDC60)	Tavaborole (DB09041)	33
	10	Q92206 (ERG1)	Q14534 (Human, SQLE)	Butenafine (DB01091)	34
		Q5A7M3 (BNA4)	Q14534 (Human, SQLE)
	11	P10613 (ERG11)	P10613 (ERG11)	Terconazole (DB00251)	35
		Q5AGW4 (ALK6)	P10613 (ERG11)
		A0A1D8PQ77 (orf19.5728)	P10613 (ERG11)
		Q59K96 (ALK8)	P10613 (ERG11)
		A0A1D8PMR7 (orf19.3105)	P10613 (ERG11)
		G1UB11 (ERG5)	P10613 (ERG11)
		A0A1D8PRP5 (CAALFM_CR00220WA)	P10613 (ERG11)
		A0A1D8PM13 (orf19.1411)	P10613 (ERG11)
		A0A1D8PRN7 (ALK2)	P10613 (ERG11)
	12	A0A1D8PPA5 (HET1)	Q9NZD2 (Human, GLTP)	Capric acid (DB03600)	36
		A0A1D8PRU0 (CAALFM_CR00650WA)	P09958 (Human, FURIN)
		Q5ANC6 (CEM1)	P0A953 (E. coli, fabB)
	13	Q5AJB1 (TFP1)	P38606 (ATP6V1A)	Bafilomycin A1 (DB06733)	37
	14	P12461 (TMP1)	P12461 (TMP1)	Flucytosine (DB01099)	38
	15	A0A1D8PMG7 (HOS1)	Q9BY41 (Human, HDAC8)	Trichostatin A (DB04297)	39
		A0A1D8PJ17 (HOS2)	Q9BY41 (Human, HDAC8)
		A0A1D8PSA6 (RPD3)	Q9BY41 (Human, HDAC8)
		A0A1D8PSA6 (RPD3)	Q8WUI4 (Human, HDAC7)
		A0A1D8PJ17 (HOS2)	O67135 (Aquifex aeolicus, acuC1)
	16	A0A1D8PH64 (ADH3)	P49327 (Human, P49327)	Cerulenin (DB01034)	40
		Q5A845 (CAALFM_CR00710CA)	P49327 (Human, P49327)
		Q5ANC6 (CEM1)	P0AAI5 (E. coli, fabF)
		Q5ANC6 (CEM1)	P0A953 (E. coli, fabB)
		Q5ANC6 (CEM1)	P49327 (Human, P49327)
	17	O13332 (AUR1)	O13332 (AUR1)	Basifungin (DB14058)	41
	18	P46598 (HSP90)	P08238 (Human, HSP90AB1)	Radicicol (DB03758)	42
		P46598 (HSP90)	P14625 (Human, HSP90B1)
		Q5AGX8 (LAT1)	P10515 (Human, DLAT)
	19	Q59LF9 (MAP2)	P50579 (Human, METAP2)	Nitroxoline (DB01422)	43
	20	Q92206 (ERG1)	Q92206 (ERG1)	Tolnaftate (DB00525)	44
	21	P83782 (QCR2)	P31930 (Human, UQCRC1)	Myxothiazol (DB04741)	45
		A0A1D8PCY8 (MAS1)	P31930 (Human, UQCRC1)
		A0A1D8PN84 (MAS2)	P31930 (Human, UQCRC1)
		A0A1D8PP59 (orf19.4016)	P31930 (Human, UQCRC1)
	22	P10613 (ERG11)	P10613 (ERG11)	Sertaconazole (DB01153)	46
		Q5AGW4 (ALK6)	P10613 (ERG11)
		A0A1D8PQ77 (orf19.5728)	P10613 (ERG11)
		Q59K96 (ALK8)	P10613 (ERG11)
		A0A1D8PMR7 (orf19.3105)	P10613 (ERG11)
		G1UB11 (ERG5)	P10613 (ERG11)
		A0A1D8PRP5 (CAALFM_CR00220WA)	P10613 (ERG11)
		A0A1D8PM13 (orf19.1411)	P10613 (ERG11)
		A0A1D8PRN7 (ALK2)	P10613 (ERG11)
	23	Q59R09 (ATM1)	P08183 (Human, ABCB1)	Miltefosine (DB09031)	47
		A0A1D8PQ34 (MDL2)	P08183 (Human, ABCB1)
		Q5A951 (MDL1)	P08183 (Human, ABCB1)
		A0A1D8PJV3 (CAALFM_C304100WA)	P08183 (Human, ABCB1)
		Q5A951 (MDL1)	P08183 (Human, ABCB1)
		A0A1D8PJV3 (CAALFM_C304100WA)	P08183 (Human, ABCB1)
		Q59R09 (ATM1)	P08183 (Human, ABCB1)
		A0A1D8PQ34 (MDL2)	P08183 (Human, ABCB1)
		Q59QD0 (CAF16)	P08183 (Human, ABCB1)
		Q59QD0 (CAF16)	P08183 (Human, ABCB1)
	24	A0A1D8PRA7 (PRR2)	P53350 (Human, PLK1)	Wortmannin (DB08059)	48
		A0A1D8PR30 (orf19.6492)	P53350 (Human, PLK1)
		A0A1D8PH53 (CAK1)	P53350 (Human, PLK1)
		A0A1D8PI35 (orf19.2222)	P53350 (Human, PLK1)
		A0A1D8PNY2 (orf19.3931.2)	P53350 (Human, PLK1)
	25	P10613 (ERG11)	P10613 (ERG11)	Tioconazole (DB01007)	49
		P10613 (ERG11)	Q16850 (CYP51A1)
		Q5AGW4 (ALK6)	P10613 (ERG11)
		A0A1D8PQ77 (orf19.5728)	P10613 (ERG11)
		Q59K96 (ALK8)	P10613 (ERG11)
		Q59K96 (ALK8)	Q16850 (CYP51A1)
		A0A1D8PMR7 (orf19.3105)	P10613 (ERG11)
		A0A1D8PMR7 (orf19.3105)	Q16850 (CYP51A1)
		G1UB11 (ERG5)	P10613 (ERG11)
		A0A1D8PRP5 (CAALFM_CR00220WA)	P10613 (ERG11)
		A0A1D8PRP5 (CAALFM_CR00220WA)	Q16850 (CYP51A1)
		A0A1D8PM13 (orf19.1411)	P10613 (ERG11)
		A0A1D8PM13	Q16850 (CYP51A1)
		Q5A6K0 (DIT2)	Q16850 (CYP51A1)
		A0A1D8PQ77 (orf19.5728)	Q16850 (CYP51A1)
		Q5AGW4 (ALK6)	Q16850 (CYP51A1)
		A0A1D8PRN7 (ALK2)	Q16850 (CYP51A1)
		G1UB11 (ERG5)	Q16850 (CYP51A1)
		A0A1D8PRN7 (ALK2)	P10613 (ERG11)
	26	P10613 (ERG11)	P10613 (ERG11)	Luliconazole (DB08933)	50
		Q5AGW4 (ALK6)	P10613 (ERG11)
		A0A1D8PQ77 (orf19.5728)	P10613 (ERG11)
		Q59K96 (ALK8)	P10613 (ERG11)
		A0A1D8PMR7 (orf19.3105)	P10613 (ERG11)
		G1UB11 (ERG5)	P10613 (ERG11)
		A0A1D8PRP5 (CAALFM_CR00220WA)	P10613 (ERG11)
		A0A1D8PM13 (orf19.1411)	P10613 (ERG11)
		A0A1D8PRN7 (ALK2)	P10613 (ERG11)
	27	Q92206 (ERG1)	Q92206 (ERG1)	Terbinafine (DB00857)	51
		Q92206 (ERG1)	Q14534 (Human, SQLE)
		Q5A7M3 (BNA4)	Q14534 (Human, SQLE)
	28	P10613 (ERG11)	P10613 (ERG11)	Econazole (DB01127)	52
		Q5AGW4 (ALK6)	P10613 (ERG11)
		A0A1D8PQ77 (orf19.5728)	P10613 (ERG11)
		Q59K96 (ALK8)	P10613 (ERG11)
		A0A1D8PMR7 (orf19.3105)	P10613 (ERG11)
		G1UB11 (ERG5)	P10613 (ERG11)
		A0A1D8PRP5 (CAALFM_CR00220WA)	P10613 (ERG11)
		A0A1D8PM13 (orf19.1411)	P10613 (ERG11)
		A0A1D8PRN7 (ALK2)	P10613 (ERG11)
	29	P10613 (ERG11)	P10613 (ERG11)	Bifonazole (DB04794)	53
		P10613 (ERG11)	P20813 (Human, CYP2B6)
		Q5AGW4 (ALK6)	P20813 (Human, CYP2B6)
		Q5AGW4 (ALK6)	P10613 (ERG11)
		A0A1D8PQ77 (orf19.5728)	P20813 (Human, CYP2B6)
		A0A1D8PQ77 (orf19.5728)	P10613 (ERG11)
		Q59K96 (ALK8)	P20813 (Human, CYP2B6)
		Q59K96 (ALK8)	P10613 (ERG11)
		A0A1D8PMR7 (orf19.3105)	P20813 (Human, CYP2B6)
		A0A1D8PMR7 (orf19.3105)	P10613 (ERG11)
		G1UB11 (ERG5)	P10613 (ERG11)
		G1UB11 (ERG5)	P20813 (Human, CYP2B6)
		A0A1D8PRP5 (CAALFM_CR00220WA)	P20813 (Human, CYP2B6)
		A0A1D8PRP5 (CAALFM_CR00220WA)	P10613 (ERG11)
		A0A1D8PM13 (orf19.1411)	P20813 (Human, CYP2B6)
		A0A1D8PM13 (orf19.1411)	P10613 (ERG11)
		Q5A6K0 (DIT2)	P20813 (Human, CYP2B6)
		A0A1D8PRN7 (ALK2)	P20813 (Human, CYP2B6)
		A0A1D8PRN7 (ALK2)	P10613 (ERG11)
	30	A0A1D8PJ01 (PMA1)	P05023 (Human, ATP1A1)	Ciclopirox (DB01188)	54
		Q5A5B0 (ENA21)	P05023 (Human, ATP1A1)
		A0A1D8PS08 (CAALFM_CR01630CA)	P05023 (Human, ATP1A1)
		A0A1D8PQK6 (PMR1)	P05023 (Human, ATP1A1)
	31	P86029 (HQD2)	Q5PXQ6 (Nocardioides simplex, chqB)	Benzoic acid (DB03793)	55
		P86029 (HQD2)	O67987 (Rhodococcus opacus, clcA)
		A0A1D8PMX7 (IFG3)	P14920 (Human, DAO)
		A0A1D8PD33 (DAO1)	P14920 (Human, DAO)
		Q59Z18 (orf19.2282)	Q5PXQ6 (Nocardioides simplex, chqB)
		Q59Z18 (orf19.2282)	O67987 (Rhodococcus opacus, clcA)
	32	P10613 (ERG11)	P10613 (ERG11)	Oxiconazole (DB00239)	56
		Q04782 (ERG7)	Q04782 (ERG7)
		Q5AGW4 (ALK6)	P10613 (ERG11)
		A0A1D8PQ77 (orf19.5728)	P10613 (ERG11)
		Q59K96 (ALK8)	P10613 (ERG11)
		A0A1D8PMR7 (orf19.3105)	P10613 (ERG11)
		G1UB11 (ERG5)	P10613 (ERG11)
		A0A1D8PRP5 (CAALFM_CR00220WA)	P10613 (ERG11)
		A0A1D8PM13 (orf19.1411)	P10613 (ERG11)
		A0A1D8PRN7 (ALK2)	P10613 (ERG11)
	33	A0A1D8PMD4 (TUB4)	P10875 (TUB2)	Griseofulvin (DB00400)	57
		A0A1D8PTV4 (TUB1)	P10875 (TUB2)
		A0A1D8PC97 (TUB2)	P10875 (TUB2)
	34	P10613 (ERG11)	P10613 (ERG11)	Miconazole (DB01110)	58
		Q5AD27 (TAH18)	P35228 (NOS2)
		A0A1D8PD78 (IFD6)	Q13303 (KCNAB2)
		A0A1D8PDE2 (LPG20)	Q14722 (KCNAB1)
		Q59QH2 (CSH1)	Q14722 (KCNAB1)
		Q5A923 (IFD3)	Q14722 (KCNAB1)
		A0A1D8PD78 (IFD6)	Q14722 (KCNAB1)
		Q59QH2 (CSH1)	Q13303 (KCNAB2)
		A0A1D8PLR7 (NCP1)	P35228 (NOS2)
		A0A1D8PDE2 (LPG20)	Q13303 (KCNAB2)
		Q5A923 (IFD3)	Q13303 (KCNAB2)
		A0A1D8PD74 (orf19.4476)	Q13303 (KCNAB2)
		A0A1D8PD74 (orf19.4476)	Q14722 (KCNAB1)
		Q5ADM5 (orf19.6816)	Q14722 (KCNAB1)
		Q5ADM5 (orf19.6816)	Q13303 (KCNAB2)
		A0A1D8PRB0 (orf19.1340)	Q14722 (KCNAB1)
		A0A1D8PRB0 (orf19.1340)	Q13303 (KCNAB2)
		Q5ADT3 (orf19.6758)	Q13303 (KCNAB2)
		Q5ADT3 (orf19.6758)	Q14722 (KCNAB1)
		A0A1D8PM13 (orf19.1411)	P10613 (ERG11)
		Q5ADT4 (GCY1)	Q13303 (KCNAB2)
		Q5ADT4 (GCY1)	Q14722 (KCNAB1)
		A0A1D8PMR7 (orf19.3105)	P10613 (ERG11)
		Q59Z55 (orf19.2244)	Q14722 (KCNAB1)
		Q5AD27 (TAH18)	P29474 (NOS3)
		A0A1D8PRP5 (CAALFM_CR00220WA)	P10613 (ERG11)
		Q59K96 (ALK8)	P10613 (ERG11)
		Q59Z55 (orf19.2244)	Q13303 (KCNAB2)
		A0A1D8PLR7 (NCP1)	P29474 (NOS3)
		A0A1D8PFX7 (orf19.7260)	Q13303 (KCNAB2)
		A0A1D8PRN7 (ALK2)	P10613 (ERG11)
		Q5AGW4 (ALK6)	P10613 (ERG11)
		A0A1D8PQ77 (orf19.5728)	P10613 (ERG11)
		G1UB11 (ERG5)	P10613 (ERG11)
	35	Q5ADM5 (orf19.6816)	Q04828 (Human, AKR1C1)	Salicylic acid (DB00936)	59
		A0A1D8PNK3 (GRE3)	Q04828 (Human, AKR1C1)
		Q59QH2 (CSH1)	Q04828 (Human, AKR1C1)
		Q5ADT4 (GCY1)	Q04828 (Human, AKR1C1)
		A0A1D8PRB0 (orf19.1340)	Q04828 (Human, AKR1C1)
		A0A1D8PI24 (ARA1)	Q04828 (Human, AKR1C1)
		Q59Z55 (orf19.2244)	Q04828 (Human, AKR1C1)
		A0A1D8PFX7 (orf19.7260)	Q04828 (Human, AKR1C1)
		Q5ADT3 (orf19.6758)	Q04828 (Human, AKR1C1)
	36	P10613 (ERG11)	P10613 (ERG11)	Fluconazole (DB00196)	60
		Q5AGW4 (ALK6)	P10613 (ERG11)
		A0A1D8PQ77 (orf19.5728)	P10613 (ERG11)
		Q59K96 (ALK8)	P10613 (ERG11)
		A0A1D8PMR7 (orf19.3105)	P10613 (ERG11)
		G1UB11 (ERG5)	P10613 (ERG11)
		A0A1D8PRP5 (CAALFM_CR00220WA)	P10613 (ERG11)
		A0A1D8PM13 (orf19.1411)	P10613 (ERG11)
		A0A1D8PRN7 (ALK2)	P10613 (ERG11)
	37	P28870 (RBP1)	P62942 (Human, FKBP1A)	Sirolimus (DB00877)	61
		A0A1D8PHX3 (TOR1)	P42345 (Human, MTOR)
	38	P10613 (ERG11)	P50859 (Candida glabrata, ERG11)	Itraconazole (DB01167)	60
		P10613 (ERG11)	Q16850 (Human, CYP51A1)
		Q5AGW4 (ALK6)	P50859 (Candida glabrata, ERG11)
		A0A1D8PQ77 (orf19.5728)	P50859 (Candida glabrata, ERG11)
		Q59K96 (ALK8)	P50859 (Candida glabrata, ERG11)
		Q59K96 (ALK8)	Q16850 (Human, CYP51A1)
		A0A1D8PMR7 (orf19.3105)	P50859 (Candida glabrata, ERG11)
		A0A1D8PMR7 (orf19.3105)	Q16850 (Human, CYP51A1)
		G1UB11 (ERG5)	P50859 (Candida glabrata, ERG11)
		A0A1D8PRP5 (CAALFM_CR00220WA)	P50859 (Candida glabrata, ERG11)
		A0A1D8PRP5 (CAALFM_CR00220WA)	Q16850 (Human, CYP51A1)
		A0A1D8PM13 (orf19.1411)	P50859 (Candida glabrata, ERG11)
		A0A1D8PM13 (orf19.1411)	Q16850 (Human, CYP51A1)
		Q5A6K0 (DIT2)	Q16850 (Human, CYP51A1)
		A0A1D8PQ77 (orf19.5728)	Q16850 (Human, CYP51A1)
		Q5AGW4 (ALK6)	Q16850 (Human, CYP51A1)
		A0A1D8PRN7 (ALK2)	Q16850 (Human, CYP51A1)
		G1UB11 (ERG5)	Q16850 (Human, CYP51A1)
		A0A1D8PRN7 (ALK2)	P50859 (Candida glabrata, ERG11)
	39	P10613 (ERG11)	P10613 (ERG11)	Voriconazole (DB00582)	60
		Q5AGW4 (ALK6)	P10613 (ERG11)
		A0A1D8PQ77 (orf19.5728)	P10613 (ERG11)
		Q59K96 (ALK8)	P10613 (ERG11)
		A0A1D8PMR7 (orf19.3105)	P10613 (ERG11)
		G1UB11 (ERG5)	P10613 (ERG11)
		A0A1D8PRP5 (CAALFM_CR00220WA)	P10613 (ERG11)
		A0A1D8PM13 (orf19.1411)	P10613 (ERG11)
		A0A1D8PRN7 (ALK2)	P10613 (ERG11)
	40	P10613 (ERG11)	P50859 (Candida glabrata, ERG11)	Ketoconazole (DB01026)	62
		P10613 (ERG11)	P05093 (Human, CYP17A1)
		P10613 (ERG11)	P08686 (Human, CYP21A2)
		Q5AGW4 (ALK6)	P08686 (Human, CYP21A2)
		Q5AGW4 (ALK6)	P05093 (Human, CYP17A1)
		Q5AGW4 (ALK6)	P50859 (Candida glabrata, ERG11)
		A0A1D8PQ77 (orf19.5728)	P05093 (Human, CYP17A1)
		A0A1D8PQ77 (orf19.5728)	P08686 (Human, CYP21A2)
		A0A1D8PQ77 (orf19.5728)	P50859 (Candida glabrata, ERG11)
		Q59K96 (ALK8)	P05093 (Human, CYP17A1)
		Q59K96 (ALK8)	P50859 (Candida glabrata, ERG11)
		Q59K96 (ALK8)	P08686 (Human, CYP21A2)
		A0A1D8PMR7 (orf19.3105)	P05093 (Human, CYP17A1)
		A0A1D8PMR7 (orf19.3105)	P08686 (Human, CYP21A2)
		A0A1D8PMR7 (orf19.3105)	P50859 (Candida glabrata, ERG11)
		G1UB11 (ERG5)	P50859 (Candida glabrata, ERG11)
		G1UB11 (ERG5)	P05093 (Human, CYP17A1)
		A0A1D8PRP5 (CAALFM_CR00220WA)	P50859 (Candida glabrata, ERG11)
		A0A1D8PRP5 (CAALFM_CR00220WA)	P05093 (Human, CYP17A1)
		A0A1D8PRP5 (CAALFM_CR00220WA)	P08686 (Human, CYP21A2)
		A0A1D8PM13 (orf19.1411)	P05093 (Human, CYP17A1)
		A0A1D8PM13 (orf19.1411)	P08686 (Human, CYP21A2)
		Q5A6K0 (DIT2)	P05093 (Human, CYP17A1)
		Q5A6K0 (DIT2)	P08686 (Human, CYP21A2)
		Q5A6K0 (DIT2)	P50859 (Candida glabrata, ERG11)
		A0A1D8PRN7 (ALK2)	P05093 (Human, CYP17A1)
		A0A1D8PRN7 (ALK2)	P08686 (Human, CYP21A2)
		A0A1D8PRN7 (ALK2)	P50859 (Candida glabrata, ERG11)
*The full references can be found in the Supplementary Information. The complete list of NOD generated results could be found on the 'Arch-NOD' page of the NOD webserver.

## Sheet: S1d_SARS-CoV-2
Table S1d: Validation of NOD-generated results with protein sequences of SARS-CoV-2 (mode-1 job).
Disease (causative pathogen)	Sl. No.	Query protein (gene)	Target homolog protein (organism, gene)	Potential candidate (DrugBank ID)	Reference to laboratory and/or clinical evidence [The reference nos. are as per the Supplementary Information file]*
Covid-19 (SARS-CoV-2)	1	P0DTC1	P0C6U8	2-[(2,4-DICHLORO-5-METHYLPHENYL)SULFONYL]-1,3-DINITRO-5-(TRIFLUOROMETHYL)BENZENE (DB07620)	63
		P0DTD1	P0C6X7
		P0DTC1	P0C6X7
	2	P0DTC1	A7J8L3	4-(Dimethylamino)benzoic acid (DB08748)	64
		P0DTC1	P0C6X7
		P0DTD1	P0C6X7
	3	P0DTC1	P0C6X7	benzyl (2-oxopropyl)carbamate (DB07293)	65
		P0DTD1	P0C6X7
	4	P0DTC1	P0C6X7	GS-441524 (DB15686)	3
		P0DTD1	P0C6X7
	5	P0DTC1	P0C6U8	NALPHA-[(BENZYLOXY)CARBONYL]-N-[(1R)-4-HYDROXY-1-METHYL-2-OXOBUTYL]-L-PHENYLALANINAMIDE (DB08732)	66
		P0DTC1	P0C6X7
		P0DTD1	P0C6X7
	6	P0DTC1	P0C6X7	Remdesivir (DB14761)	2
		P0DTD1	P0C6X7
	7	P0DTC1	P0C6U8	S-[5-(TRIFLUOROMETHYL)-4H-1,2,4-TRIAZOL-3-YL] 5-(PHENYLETHYNYL)FURAN-2-CARBOTHIOATE (DB07743)	63
		P0DTC1	P0C6X7
		P0DTD1	P0C6X7
*The full references can be found in the Supplementary Information. The complete list of NOD generated results could be found on the 'Arch-NOD' page of the NOD webserver.

## Sheet: S1e_HIV protease
Table S1e: Validation of NOD-generated results with HIV protease sequence (mode-2 job).
Disease (causative pathogen)	Sl. No.	Query protein (gene)	Target homolog protein (organism, gene)	Potential candidate (DrugBank ID)	Reference to laboratory and/or clinical evidence [The reference nos. are as per the Supplementary Information file]*
HIV infection (HIV-1)	1	Q72874 (pol)	Q72874 (pol)	Indinavir (DB00224)	67
	2		Q72874 (pol)	Ritonavir (DB00503)	68
	3		Q72874 (pol)	Amprenavir (DB00701)	69
	4		Q72874 (pol)	Tipranavir (DB00932)	70
	5		Q72874 (pol)	Atazanavir (DB01072)	71
	6		Q72874 (pol)	Saquinavir (DB01232)	72
	7		Q72874 (pol)	Darunavir (DB01264)	72
	8		Q72874 (pol)	Lopinavir (DB01601)	72
	9		Q72874 (pol)	Fosamprenavir (DB01319)	72
	10		Q72874 (pol)	Brecanavir (DB04887)	73
	11		O90777 (HIV, HIV-1 protease)	Nelfinavir (DB00220)	74
	12		O90777 (HIV, HIV-1 protease)	TMC-310911 (DB15623)	75
The complete list of NOD generated results could be found on the 'Arch-NOD' page of the NOD webserver. *The full references can be found in the Supplementary Information.

## Sheet: S1f_HCV protease
Table S1f: Validation of NOD-generated results with HCV protease sequence (mode-2 job).
Disease (causative pathogen)	Sl. No.	Query protein (gene)	Target homolog protein (protein name, organism)	Primary potential candidate (DrugBank ID)	Reference to laboratory and/or clinical evidence [The reference nos. are as per the Supplementary Information file]*
Hepatitis (Hepatitis C Virus)	1	Q91RS4 (N/A)#	Q91RS4	Simeprevir (DB06290)	76
	2		Q91RS4	Glecaprevir (DB13879)	77
	3		Q91RS4; P26664 (Genome polyprotein, Hepatitis C virus genotype 1a (isolate 1) (HCV))	N-[(2R,3S)-1-((2S)-2-{[(CYCLOPENTYLAMINO)CARBONYL]AMINO}-3-METHYLBUTANOYL)-2-(1-FORMYL-1-CYCLOBUTYL)PYRROLIDINYL]CYCLOPROPANECARBOXAMIDE (DB07582)	78
	4		P26663 (Genome polyprotein, Hepatitis C virus genotype 1b (isolate BK) (HCV))	Asunaprevir (DB11586)	79
	5		B0B3C9 (Genome polyprotein, Hepacivirus C)	Telaprevir (DB05521)	80
	6		B0B3C9 (Genome polyprotein, Hepacivirus C)	Boceprevir (DB08873)	81
	7		B0B3C9 (Genome polyprotein, Hepacivirus C)	Paritaprevir (DB09297)	82
	8		B0B3C9 (Genome polyprotein, Hepacivirus C)	Grazoprevir (DB11575)	83
	9		B0B3C9 (Genome polyprotein, Hepacivirus C)	Voxilaprevir (DB12026)	84
	10		P26664 (Genome polyprotein, Hepatitis C virus genotype 1a (isolate 1) (HCV))	Ciluprevir (DB05868)	85
	11		P26664 (Genome polyprotein, Hepatitis C virus genotype 1a (isolate 1) (HCV))	XTL-6865 (DB06058)	NCT00300807
	12		P26664 (Genome polyprotein, Hepatitis C virus genotype 1a (isolate 1) (HCV))	Danoprevir (DB11779)	86
	13		Q9WMX2 (Genome polyprotein, Hepatitis C virus genotype 1b (isolate Con1) (HCV)); P26663 (Genome polyprotein, Hepatitis C virus genotype 1b (isolate BK) (HCV))	Nesbuvir (DB07238)	87
#The gene name is not available (N/A) in UniProt. The submitted name of the protein is NS3 protease (Organism: Hepacivirus C) In the absence of a regular literature publication, the relevant registered clinical trial number (NCT number for the respective candidate available https://clinicaltrials.gov/) is mentioned in the reference column. The complete list of NOD generated results could be found…

## Sheet: S1g_Aurora-A kinase
Table S1g: Validation of NOD-generated results with Aurora-A kinase (mode-2 job).
Disease	Sl. No.	Query (organism, gene)	Target	Organism (Target)	Gene names (Target)	Primary potential candidate (DrugBank ID)	Reference to laboratory and/or clinical evidence [The reference nos. are as per the Supplementary Information file]*
Cancer	1	O14965 (Human, AURKA)	O14965	Human	AURKA	AT9283 (DB05169)	88
	2		O14965	Human	AURKA	CYC116 (DB05198)	NCT00560716
	3		O14965	Human	AURKA	Alisertib (DB05220)	89
	4		O14965	Human	AURKA	SNS-314 (DB06134)	90
	5		O14965	Human	AURKA	Cenisertib (DB06347)	91
	6		O14965	Human	AURKA	Enzastaurin (DB06486)	92
	7		O14965	Human	AURKA	4-(4-METHYLPIPERAZIN-1-YL)-N-[5-(2-THIENYLACETYL)-1,5-DIHYDROPYRROLO[3,4-C]PYRAZOL-3-YL]BENZAMIDE (DB07186)	93
	8		O14965	Human	AURKA	AKI-001 (DB07266)	94
	9		O14965	Human	AURKA	1-{5-[2-(thieno[3,2-d]pyrimidin-4-ylamino)ethyl]-1,3-thiazol-2-yl}-3-[3-(trifluoromethyl)phenyl]urea (DB07360)	90
	10		O14965	Human	AURKA	1-(5-{2-[(1-methyl-1H-pyrazolo[4,3-d]pyrimidin-7-yl)amino]ethyl}-1,3-thiazol-2-yl)-3-[3-(trifluoromethyl)phenyl]urea (DB07362)	95
	11		O14965	Human	AURKA	N-{3-[(4-{[3-(TRIFLUOROMETHYL)PHENYL]AMINO}PYRIMIDIN-2-YL)AMINO]PHENYL}CYCLOPROPANECARBOXAMIDE (DB07545)	96
	12		O14965	Human	AURKA	N-butyl-3-{[6-(9H-purin-6-ylamino)hexanoyl]amino}benzamide (DB07801)	97
	13		O14965	Human	AURKA	2-(1H-pyrazol-3-yl)-1H-benzimidazole (DB08065)	98
	14		O14965	Human	AURKA	N-[3-(1H-BENZIMIDAZOL-2-YL)-1H-PYRAZOL-4-YL]BENZAMIDE (DB08066)	98
	15		O14965	Human	AURKA	Fostamatinib (DB12010)	99
			Q9UKI8	Human	IRAK4
			Q9BYT3	Human	MARK2
			P19525	Human	MKNK2
			Q9P286	Plasmodium falciparum (isolate 3D7)	CPK1
			O75460	Human	PRPF4B
			Q15746	Human	SGK3
			O15075	Human	PRKCI
			P43403	Human	NIM1K
			Q13233	Human	MAST1
			P49761	Human	CSNK2A2
			P41743	Human	DCLK2
			Q15208	Human	PTK2
			Q9NWZ3	Human	MAP2K2
			Q02156	Human	PAK5
			P49760	Human	TTK
			Q9HAZ1	Human	DDR1
			Q86UE8	Human	MAPK7
			P04049	Human	TLK1
			P49759	Human	ALK
			Q13177	Human	PRKCD
			Q96Q40	Human	MAP2K3
			O75914	Human	PAK1
			P46734	Human	MAPKAPK5
			P51812	Human	RPS6KA3
			Q16512	Human	ZAP70
			Q05655	Human	DAPK2
			Q9C098	Human	PLK2
			P27448	Human	MARK1
			Q9Y2H1	Human	SLK
			Q13153	Human	PKN2
			Q9NYY3	Human	PRKACA
			P21802	Human	ROCK2
			P62344	Human	MYLK
			Q7KZI7	Human	MARK3
			Q96BR1	Human	DCLK3
			P30291	Human	ACVR1
			P53671	Human	CLK2
			Q8IY84	Human	STK38L
			Q05397	Human	OXSR1
			Q9P0L2	Human	CAMK1D
			P36507	Human	MUSK
			P15056	Human	MAPK14
			Q16513	Human	PAK2
			P52564	Human	CLK1
			Q13163	Human	ROS1
			Q96RR4	Human	CDKL1
			Q9H2X6	Human	ERN1
			Q9Y2H9	Human	CILK1
	16		O14965	Human	AURKA	MLN8054 (DB13061)	100
In the absence of a regular literature publication, the relevant registered clinical trial number (NCT number for the respective candidate available https://clinicaltrials.gov/) is mentioned in the reference column. The complete list of NOD generated results could be found on the 'Arch-NOD' page of the NOD webserver. *The full references can be found in the Supplementary Information.

## Sheet: S1h_BCR
Table S1h: Validation of NOD-generated results with Breakpoint cluster region protein (mode-2 job).
Disease	Sl. No.	Query protein (organism, gene)	Target homolog protein (organism, gene)	Primary potential candidate (DrugBank ID)	Reference to laboratory and/or clinical evidence [The reference nos. are as per the Supplementary Information file]*
Leukemia	1	P11274 (Human, BCR)	P11274 (Human, BCR)	Imatinib (DB00619)	101
	2		P11274 (Human, BCR)	Dasatinib (DB01254)	102
	3		P11274 (Human, BCR)	Bosutinib (DB06616)	103
	4		P11274 (Human, BCR)	Ponatinib (DB08901)	104
The complete list of NOD generated results could be found on the 'Arch-NOD' page of the NOD webserver. *The full references can be found in the Supplementary Information.
