# Supplementary material for: NOD: a web server to predict New use of Old Drugs to facilitate drug repurposing
Source: Sci Rep. 2021 Jun 29;11:13540. doi: 10.1038/s41598-021-92903-8 (PMC8241987; doi:10.1038/s41598-021-92903-8)
Supplement: Supplementary file 3 — Supplementary Information 3. [file 41598_2021_92903_MOESM3_ESM.xlsx]

## Sheet: TableS2
Table S2: Results of control study
S. no.	Query Protein			Target Homolog			Sequence identity between query protein and target homolog*	Name of approved drugs that interacts with target homolog	Is the association identified by NOD ?	Is the association identified by DrugBank ?	Reference to experimental and/or clinical data supporting the effectiveness of the suggested drug against the corrsponding infection. [The reference nos. are as per the Supplementary Information file]$
	UniProt_ID	Organism	Name	UniProt ID	Organism	Name
1	P9WPM3	M. tuberculosis	Putative cytochrome P450 138	P50859	Candida glabrata	Lanosterol 14-alpha demethylase	22.2%	Isavuconazole, Itraconazole, Ketoconazole, Efinaconazole	Yes	Yes	105, 106
2	I6Y778	M. tuberculosis	3-oxoacyl-(Acyl-carrier-protein) reductase FabG4	P0AEK4	Escherichia coli	Enoyl-[acyl-carrier-protein] reductase [NADH] FabI	21.7%	Triclosan	Yes	No	107
3	P9WPN1	M. tuberculosis	Putative cytochrome P450 135A1	P50859	Candida glabrata	Lanosterol 14-alpha demethylase	25.6%	Isavuconazole, Itraconazole, Ketoconazole, Efinaconazole	Yes	Yes	105, 106
4	O06413	M. tuberculosis	Oxidoreductase	P0AEK4	Escherichia coli	Enoyl-[acyl-carrier-protein] reductase [NADH] FabI	23.4%	Triclosan	Yes	No	107
5	P9WPM9	M. tuberculosis	Putative cytochrome P450 135B1	P50859	Candida glabrata	Lanosterol 14-alpha demethylase	20.9%	Isavuconazole, Itraconazole, Ketoconazole, Efinaconazole	Yes	Yes	105, 106
6	P9WGS7	M. tuberculosis	Short-chain type dehydrogenase/reductase	P0AEK4	Escherichia coli	Enoyl-[acyl-carrier-protein] reductase [NADH] FabI	20.5%	Triclosan	Yes	No	107
7	I6WZD9	M. tuberculosis	Oxidoreductase	P0AEK4	Escherichia coli	Enoyl-[acyl-carrier-protein] reductase [NADH] FabI	24.2%	Triclosan	Yes	No	107
8	O05900	M. tuberculosis	Conserved protein	P15555	Streptomyces sp.	D-alanyl-D-alanine carboxypeptidase	24.4%	Cefalotin	Yes	No	108, 109
9	P9WGR7	M. tuberculosis	Short-chain type dehydrogenase/reductase	P0AEK4	Escherichia coli	Enoyl-[acyl-carrier-protein] reductase [NADH] FabI	22.7%	Triclosan	Yes	No	107
10	O53398	M. tuberculosis	Oxidoreductase	P0AEK4	Escherichia coli	Enoyl-[acyl-carrier-protein] reductase [NADH] FabI	20.5%	Triclosan	Yes	No	107
11	P9WGS1	M. tuberculosis	Fatty acyl-CoA reductase	P0AEK4	Escherichia coli	Enoyl-[acyl-carrier-protein] reductase [NADH] FabI	21.8%	Triclosan	Yes	No	107
12	P95286	M. tuberculosis	Short-chain type dehydrogenase/reductase	P0AEK4	Escherichia coli	Enoyl-[acyl-carrier-protein] reductase [NADH] FabI	22.0%	Triclosan	Yes	No	107
13	P9WGT1	M. tuberculosis	3-alpha-(or 20-beta)-hydroxysteroid dehydrogenase FabG3	P0AEK4	Escherichia coli	Enoyl-[acyl-carrier-protein] reductase [NADH] FabI	24.2%	Triclosan	Yes	No	107
14	I6YEB6	M. tuberculosis	Short-chain type dehydrogenase/reductase	P0AEK4	Escherichia coli	Enoyl-[acyl-carrier-protein] reductase [NADH] FabI	27.9%	Triclosan	Yes	Yes	107
15	I6Y1W3	M. tuberculosis	Short-chain type dehydrogenase/reductase	P0AEK4	Escherichia coli	Enoyl-[acyl-carrier-protein] reductase [NADH] FabI	22.1%	Triclosan	Yes	No	107
16	O33346	M. tuberculosis	Penicillin-binding lipoprotein	P0A3M6	Streptococcus pneumoniae	Penicillin-binding protein 2B	22.2%	Ceftriaxone, Cefotaxime, Piperacillin, Cefoxitin, Cefditoren, Nafcillin, Meticillin, Oxacillin, Dicloxacillin, Cefalotin, Cephalexin, Ampicillin, Cefadroxil, Hetacillin	Yes	No	108, 109
17	P9WPM7	M. tuberculosis	Putative cytochrome P450 136	P50859	Candida glabrata	Lanosterol 14-alpha demethylase	22.0%	Isavuconazole, Itraconazole, Ketoconazole, Efinaconazole	Yes	Yes	105, 106
18	I6YGX2	M. tuberculosis	Bifunctional membrane-associated penicillin-binding protein 1A/1B PonA2	Q04707	Streptococcus pneumoniae serotype 4	Penicillin-binding protein 1A	25.0%	Cefprozil	Yes	Yes	108, 109
19	O77354	P.falciparum	valine--tRNA ligase, putative	P41972	Staphylococcus aureus	Isoleucine--tRNA ligase	17.8%	Mupirocin	Yes	No	110
20	C0H4A1	P.falciparum	conserved Plasmodium protein, unknown function	O24990	Helicobacter pylori	Enoyl-[acyl-carrier-protein] reductase [NADH] FabI	21.9%	Triclosan	Yes	No	111
21	Q9U0H1	P.falciparum	DNA polymerase alpha	P08546	Human cytomegalovirus	DNA polymerase catalytic subunit	17.6%	Cidofovir,Foscarnet	Yes	No	N/A
22	C0H4B9	P.falciparum	steroid dehydrogenase, putative	O24990	Helicobacter pylori	Enoyl-[acyl-carrier-protein] reductase [NADH] FabI	18.8%	Triclosan	Yes	No	111
23	Q8I410	P.falciparum	RNA polymerase I (RNAPI)	P0A8T7	Escherichia coli	DNA-directed RNA polymerase subunit beta'	18%	Rifabutin,Rifampicin	Yes	Yes	N/A
24	C6KT64	P.falciparum	leucine--tRNA ligase, putative	P41972	Staphylococcus aureus	Isoleucine--tRNA ligase	17.2%	Mupirocin	Yes	No	110
25	Q8IBP8	P.falciparum	ferrodoxin reductase-like protein	P66010	Staphylococcus aureus	Thioredoxin reductase	22.2%	Azelaic Acid	Yes	No	N/A
26	C0H4S9	P.falciparum	conserved Plasmodium protein, unknown function	P53848	Saccharomyces cerevisiae	Folic acid synthesis protein FOL1	19.4%	Sulfacetamide	No	No	112
27	Q8IBB3	P.falciparum	leucine--tRNA ligase, putative	P41972	Staphylococcus aureus	Isoleucine--tRNA ligase	16.1%	Mupirocin	Yes	No	110
28	Q8I302	P.falciparum	type II NADH:ubiquinone oxidoreductase (NDH2)	P66010	Staphylococcus aureus	Thioredoxin reductase	20.8%	Azelaic Acid	No	No	N/A
29	A0A143ZYZ7	P.falciparum	DNA polymerase zeta catalytic subunit, putative	P04293	Human herpesvirus 1	DNA polymerase catalytic subunit	16.7%	Penciclovir,Famciclovir,Foscarnet, Acyclovir, Valaciclovir,Ganciclovir, Vidarabine, Talimogene laherparepvec	Yes	Yes	N/A
30	A0A143ZYZ7	P.falciparum	DNA polymerase zeta catalytic subunit, putative	P09252	Varicella-zoster virus	DNA polymerase catalytic subunit	18.8%	Acyclovir	Yes	Yes	N/A
31	Q8IEN9	P.falciparum	DNA-directed RNA polymerase alpha chain, putative	P0A7Z4	Escherichia coli	DNA-directed RNA polymerase subunit alpha	22.7%	Rifabutin, Rifamycin	Yes	No	N/A
32	A0A1D8PS12	C.albicans	Leucine--tRNA ligase	P41972	Staphylococcus aureus	Isoleucine--tRNA ligase	0.205	Mupirocin	Yes	No	113
*In this study, the sequence identities between each pair of protein sequences were calculated by using EMBOSS Water program114 $The full references can be found in the Supplementary Information. N/A : Not available
